# Supplementary material
Source: PubMed Central journal article supplement (PMC9358400)
Supplement: EMMM-14-e15230-s001.pdf [file EMMM-14-e15230-s001.pdf]

## **Table of Contents – Appendix**

**Appendix Figure S1** - Binding of SARS-CoV-2 RBD variants to ACE2

**Figure Legend Appendix Figure S1**

**Appendix Figure S2** - Binding of SARS-CoV-2 Spike variants to ACE2

**Figure Legend Appendix Figure S2**

**Appendix Figure S3** - SARS-CoV-2 neutralization studies

**Figure Legend Appendix Figure S3**

**Appendix Figure S4** - Neutralization of the SARS-CoV-2 Omicron variant by recombinant murine ACE2 (rmACE2) or recombinant human ACE2 (APN01)

**Figure Legend Appendix Figure S4**

**Appendix Figure S5** - Neutralization of the reference strain of SARS-CoV-2 or SARS-CoV-2 Omicron by vaccinees' sera

**Figure Legend Appendix Figure S5**

**Appendix Table S1** - List of mutations of Variants of Concern

**Appendix Table S2** - List of primers

**Appendix Table S3** - List of antibodies

**Appendix Table S4** – p-values for Figures and Appendix Figures

# Appendix Figure S1

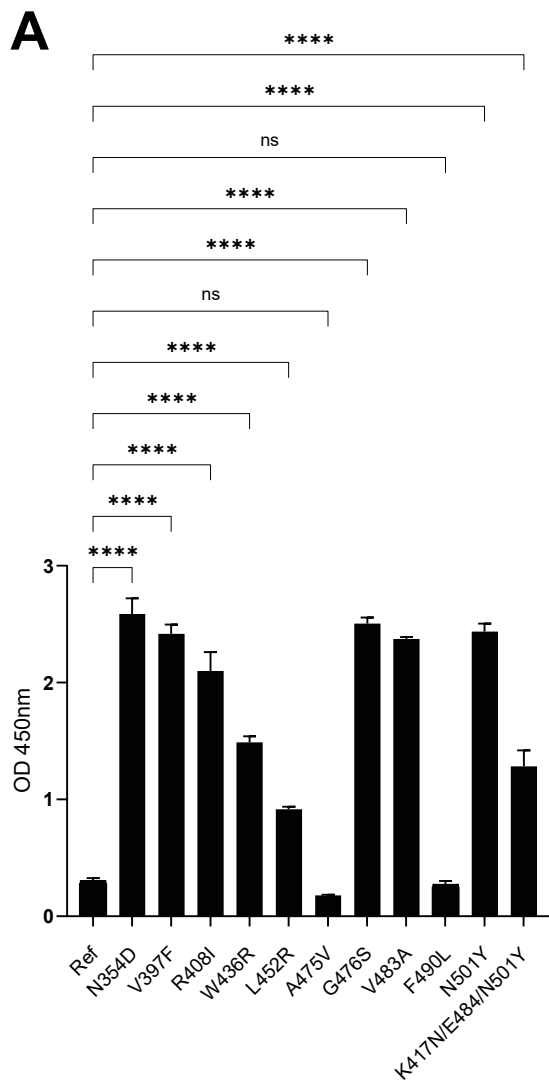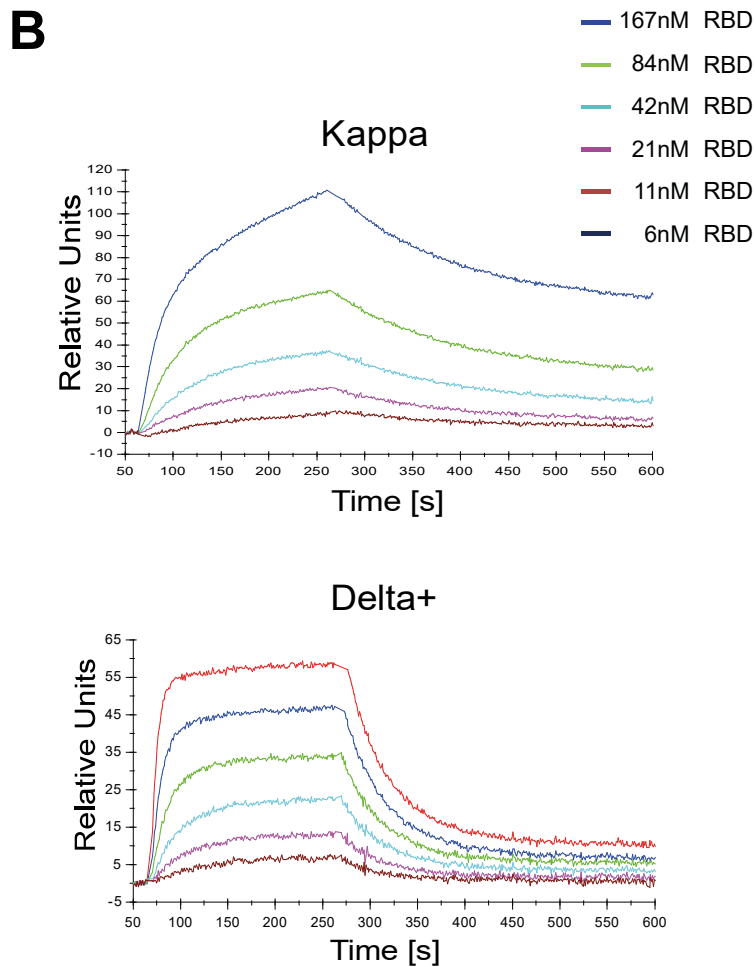

### **Appendix Figure S1. Binding of SARS-CoV-2 RBD variants to ACE2.**

**(a)** ELISA analysis showing the APN01 binding strength of SARS-CoV-2 RBDs carrying the indicated mutations. x-axis labels indicate the SARS-CoV-2 RBD variant substitutions tested. One representative experiment out of 3 independent experiments is shown. Shown are means of triplicate analyses with standard deviations. Statistical significance is indicated by asterisks (p-value < 0.05: \*; p-value < 0.001: \*\*\*; p-value < 0.0001: \*\*\*\* as calculated with one-way ANOVA).

**(b)** Representative SPR sensorgram images for the SARS-CoV-2 RBD/APN01 interaction of the SARS-CoV-2 variant Kappa and Delta+ (K417N, L452R, T478K; see Figure 1b for respective values).

# Appendix Figure S2

## A

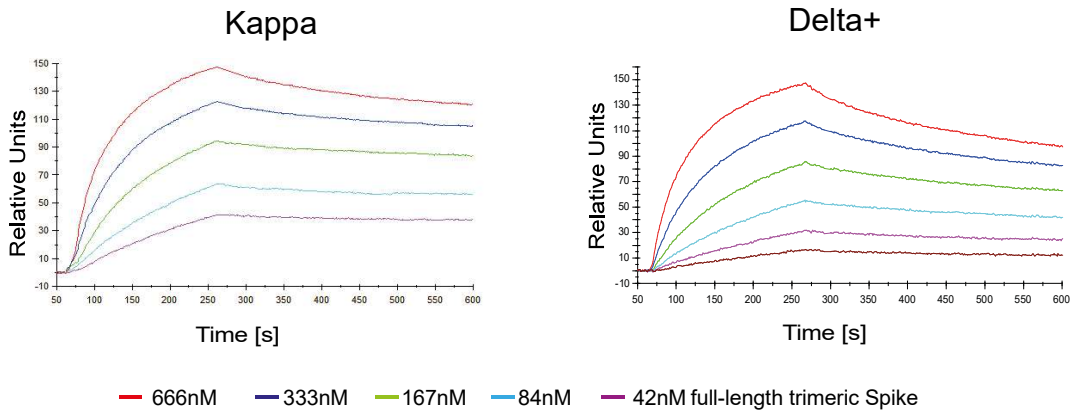

## **Appendix Figure S2. Binding of SARS-CoV-2 Spike variants to ACE2.**

**(a)** Representative sensorgram images for the SPR analysis conducted with full-length trimeric Spike proteins in the pre-fusion state with APN01. Depicted are SARS-CoV-2 variants Delta+ and Kappa. See Figure 1 **(b)** for respective mutations and Figure 1 (d) for  $k_a$ ,  $k_d$ , as well as  $K_D$  values for the interaction of APN01 and the full-length trimeric Spike proteins of the Delta+ and Kappa variants.

# Appendix Figure S3

## A VeroE6

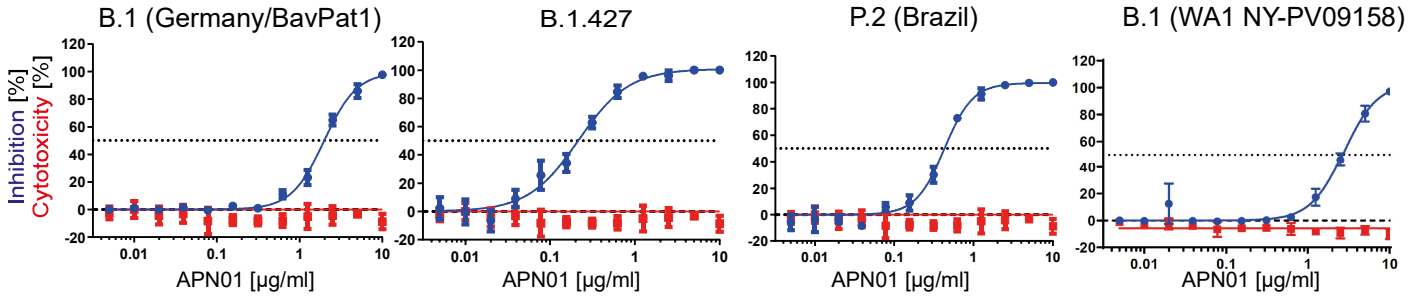

## B Calu-3

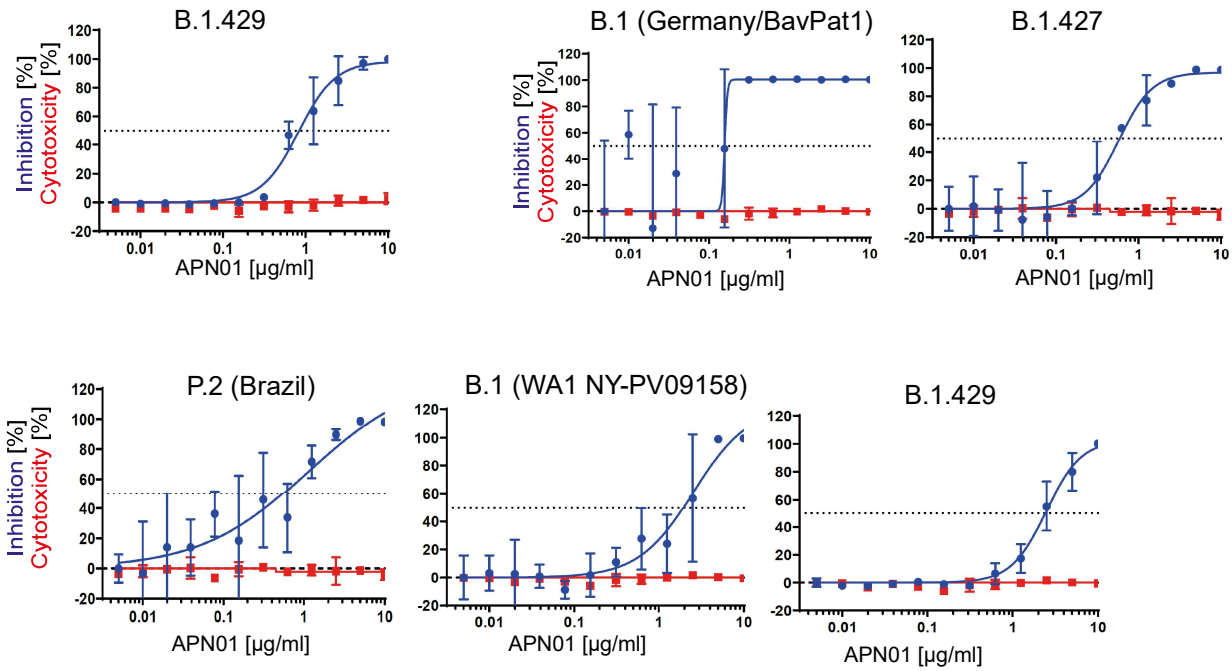

### **Appendix Figure S3. SARS-CoV-2 neutralization studies.**

**(a, b)** Neutralization of the indicated SARS-CoV-2 isolates (blue line) as well as cytotoxicity of APN01 (red line) in VeroE6 cells **(a)** and Calu-3 cells **(b)**. Analysis was done in quadruplicate with mean and standard deviations shown. Y-axis depicts the percentage of neutralization and cytotoxicity, respectively. See Figure 3 (a) for associated information on the strains and infection conditions and Figure 3 (c) for the  $IC_{50}$  and  $IC_{90}$  values.

# Appendix Figure S4

## A

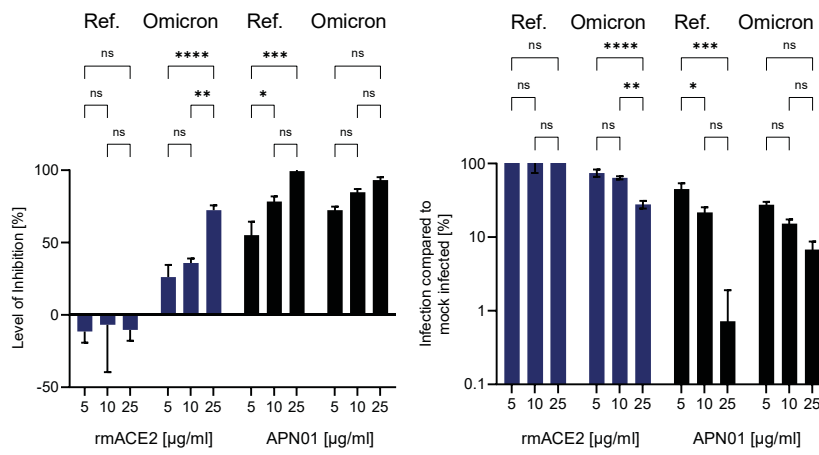

## B

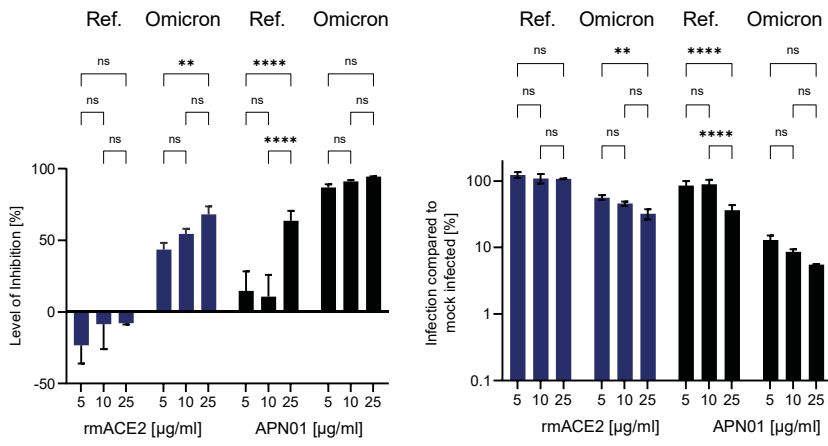



**Appendix Figure S4. Neutralization of the SARS-CoV-2 Omicron variant by recombinant murine ACE2 (rmACE2) or recombinant human ACE2 (APN01).**

**(a, b)** Calu-3 cells were infected with SARS-CoV-2 Omicron with a MOI of 0.01 **(a)** or MOI of 0.1 **(b)** after pre-incubation with the indicated doses of either rmACE2 (purple bars) or APN01 (black bars). Left panels in **(a, b)** depict the level of inhibition, right panels in **(a, b)** depict percent infection compared to mock infected controls. Shown are means of triplicate analyses with standard deviations. Statistical significance is indicated by asterisks (p-value < 0.05: \*; p-value < 0.01: \*\*; p-value < 0.001: \*\*\* as calculated with one-way ANOVA.

Appendix Figure S5

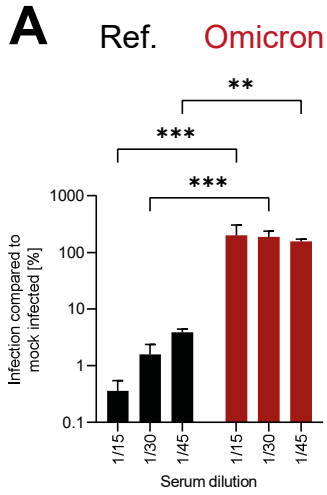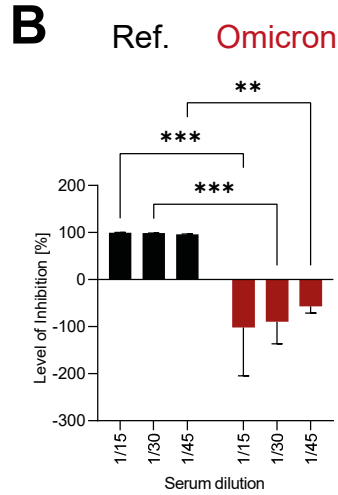

Vaccinee #1

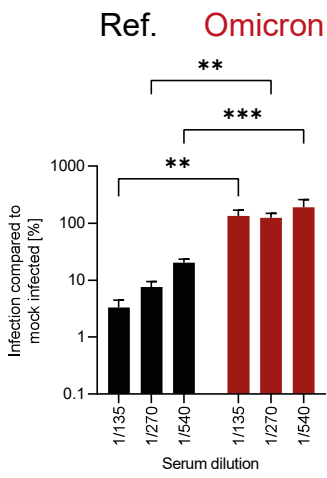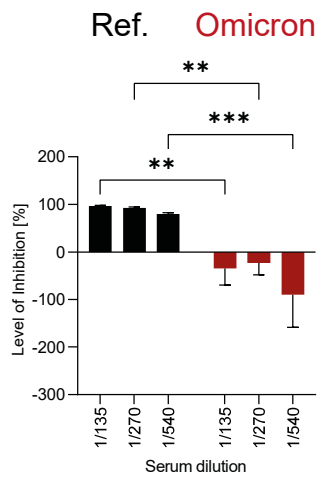

Vaccinee #2

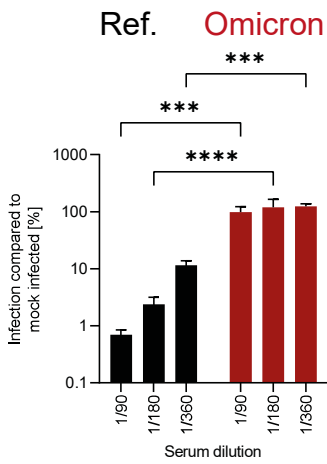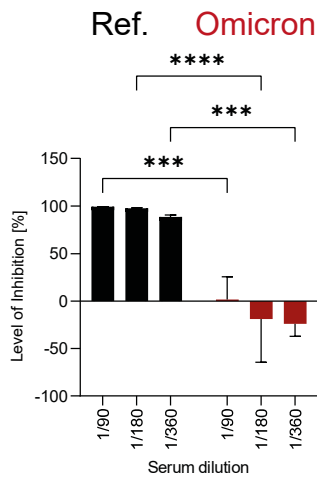

Vaccinee #3

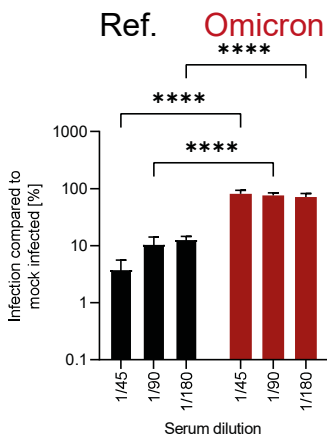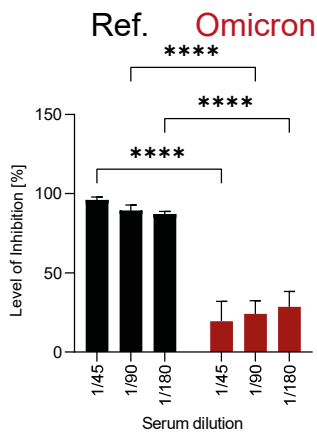

Vaccinee #4

**Appendix Figure S5. Neutralization of the reference strain of SARS-CoV-2 or SARS-CoV-2 Omicron by vaccinees' sera.**

**(a, b)** VeroE6 cells were infected with either the SARS-CoV-2 reference strain (black bars) or Omicron (red bars) after pre-incubation with the indicated dilutions of vaccinee sera. Sera were taken 5-7 weeks after the second vaccination with the mRNA vaccine *Comirnaty* (BNT162b2; Biontech/Pfizer). Graphs depict the infection as compared to mock infected cells with the indicated dilutions of vaccinee sera **(a)** or the level of inhibition of infection **(b)**. Data are shown as mean values of triplicate analyses with standard deviations. Statistical significance is indicated by asterisks p-value < 0.05: \*; p-value < 0.01: \*\*; p-value < 0.001: \*\*\* as calculated with two-way ANOVA.

**Appendix Table S1 – List of mutations of Variants of Concern**

| <b>Position</b> | <b>Wuhan</b>     | <b>Alpha</b> | <b>Type</b> | <b>Gene</b> |
|-----------------|------------------|--------------|-------------|-------------|
| 241             | C                | T            | SNP         | ORF1ab      |
| 913             | C                | T            | SNP         | ORF1ab      |
| 3037            | C                | T            | SNP         | ORF1ab      |
| 3267            | C                | T            | SNP         | ORF1ab      |
| 3743            | C                | T            | SNP         | ORF1ab      |
| 5388            | C                | A            | SNP         | ORF1ab      |
| 5986            | C                | T            | SNP         | ORF1ab      |
| 6954            | T                | C            | SNP         | ORF1ab      |
| 11287           | GTCTGGTTTT       | G            | DEL         | ORF1ab      |
| 14408           | C                | T            | SNP         | ORF1ab      |
| 14676           | C                | T            | SNP         | ORF1ab      |
| 15279           | C                | T            | SNP         | ORF1ab      |
| 16176           | T                | C            | SNP         | ORF1ab      |
| <b>21764</b>    | <b>ATACATG</b>   | <b>A</b>     | <b>DEL</b>  | <b>S</b>    |
| <b>21990</b>    | <b>TTTA</b>      | <b>T</b>     | <b>DEL</b>  | <b>S</b>    |
| <b>23063</b>    | <b>A</b>         | <b>T</b>     | <b>SNP</b>  | <b>S</b>    |
| <b>23271</b>    | <b>C</b>         | <b>A</b>     | <b>SNP</b>  | <b>S</b>    |
| <b>23403</b>    | <b>A</b>         | <b>G</b>     | <b>SNP</b>  | <b>S</b>    |
| <b>23604</b>    | <b>C</b>         | <b>A</b>     | <b>SNP</b>  | <b>S</b>    |
| <b>23709</b>    | <b>C</b>         | <b>T</b>     | <b>SNP</b>  | <b>S</b>    |
| <b>24506</b>    | <b>T</b>         | <b>G</b>     | <b>SNP</b>  | <b>S</b>    |
| <b>24914</b>    | <b>G</b>         | <b>C</b>     | <b>SNP</b>  | <b>S</b>    |
| 27972           | C                | T            | SNP         | ORF8        |
| 28048           | G                | T            | SNP         | ORF8        |
| 28111           | A                | G            | SNP         | ORF8        |
| 28280           | GAT              | CTA          | MNP         | N           |
| 28881           | GGG              | AAC          | MNP         | N           |
| 28977           | C                | T            | SNP         | N           |
| <b>Position</b> | <b>Wuhan</b>     | <b>Beta</b>  | <b>Type</b> | <b>Gene</b> |
| 241             | C                | T            | SNP         | ORF1ab      |
| 1059            | C                | T            | SNP         | ORF1ab      |
| 3037            | C                | T            | SNP         | ORF1ab      |
| 5230            | G                | T            | SNP         | ORF1ab      |
| 9438            | C                | T            | SNP         | ORF1ab      |
| 9968            | G                | T            | SNP         | ORF1ab      |
| 10323           | A                | G            | SNP         | ORF1ab      |
| 11288           | TCTGGTTTT        | -            | DEL         | ORF1ab      |
| 12747           | C                | T            | SNP         | ORF1ab      |
| 14408           | C                | T            | SNP         | ORF1ab      |
| 17999           | C                | T            | SNP         | ORF1ab      |
| 18657           | C                | T            | SNP         | ORF1ab      |
| 21191           | C                | T            | SNP         | ORF1ab      |
| <b>22206</b>    | <b>A</b>         | <b>G</b>     | <b>SNP</b>  | <b>S</b>    |
| <b>22281</b>    | <b>CTTTACTTG</b> | <b>-</b>     | <b>DEL</b>  | <b>S</b>    |

| 22813    | G                                                                             | T     | SNP  | S      |
|----------|-------------------------------------------------------------------------------|-------|------|--------|
| 23012    | G                                                                             | A     | SNP  | S      |
| 23063    | A                                                                             | T     | SNP  | S      |
| 23403    | A                                                                             | G     | SNP  | S      |
| 23664    | C                                                                             | T     | SNP  | S      |
| 23929    | C                                                                             | T     | SNP  | S      |
| 24095    | G                                                                             | T     | SNP  | S      |
| 25563    | G                                                                             | T     | SNP  | ORF3a  |
| 25904    | C                                                                             | T     | SNP  | ORF3a  |
| 26456    | C                                                                             | T     | SNP  | E      |
| 27553    | TTTGCCTGACTTGTCTTTAGCACTCAAT<br>TTGCTTTTGTCTTGTCTGACGGCGTAAAA<br>CACGTCTATCAG | -     | DEL  | ORF7a  |
| 28253    | CA                                                                            | TC    | SNP  | ORF8   |
| 28887    | C                                                                             | T     | SNP  | N      |
| Position | Wuhan                                                                         | Delta | Type | Gene   |
| 210      | G                                                                             | T     | SNP  | ORF1ab |
| 241      | C                                                                             | T     | SNP  | ORF1ab |
| 1191     | C                                                                             | T     | SNP  | ORF1ab |
| 1267     | C                                                                             | T     | SNP  | ORF1ab |
| 3037     | C                                                                             | T     | SNP  | ORF1ab |
| 5184     | C                                                                             | T     | SNP  | ORF1ab |
| 9891     | C                                                                             | T     | SNP  | ORF1ab |
| 11418    | T                                                                             | C     | SNP  | ORF1ab |
| 12946    | T                                                                             | C     | DEL  | ORF1ab |
| 14408    | C                                                                             | T     | SNP  | ORF1ab |
| 15451    | G                                                                             | A     | SNP  | ORF1ab |
| 16466    | C                                                                             | T     | SNP  | ORF1ab |
| 18176    | C                                                                             | T     | SNP  | ORF1ab |
| 20262    | A                                                                             | G     | SNP  | ORF1ab |
| 21618    | C                                                                             | G     | SNP  | S      |
| 21987    | G                                                                             | A     | SNP  | S      |
| 22029    | AGTTCA                                                                        | -     | DEL  | S      |
| 22917    | T                                                                             | G     | SNP  | S      |
| 22995    | C                                                                             | A     | SNP  | S      |
| 23403    | A                                                                             | G     | SNP  | S      |
| 23604    | C                                                                             | G     | SNP  | S      |
| 24410    | G                                                                             | A     | SNP  | S      |
| 25469    | C                                                                             | T     | SNP  | ORF3a  |
| 25562    | A                                                                             | G     | SNP  | ORF3a  |
| 26767    | T                                                                             | C     | SNP  | M      |
| 27638    | T                                                                             | C     | SNP  | ORF7a  |
| 27739    | C                                                                             | T     | SNP  | ORF7a  |
| 27752    | C                                                                             | T     | SNP  | ORF7a  |
| 28248    | GATTC                                                                         | -     | DEL  | ORF8   |
| 28271    | A                                                                             | -     | DEL  | ORF8   |
| 28461    | A                                                                             | G     | SNP  | N      |
| 28881    | G                                                                             | T     | SNP  | N      |

|                 |                   |                  |             |             |
|-----------------|-------------------|------------------|-------------|-------------|
| 29402           | G                 | T                | SNP         | N           |
| 29742           | G                 | T                | SNP         | ORF10       |
| <b>Position</b> | <b>Wuhan</b>      | <b>Omicron</b>   | <b>Type</b> | <b>Gene</b> |
| 241             | C                 | T                | SNP         | ORF1ab      |
| 2832            | A                 | G                | SNP         | ORF1ab      |
| 3037            | C                 | T                | SNP         | ORF1ab      |
| 3267            | C                 | T                | SNP         | ORF1ab      |
| 5386            | T                 | G                | SNP         | ORF1ab      |
| 6513            | GTT               | -                | DEL         | ORF1ab      |
| 8393            | G                 | A                | SNP         | ORF1ab      |
| 10029           | C                 | T                | SNP         | ORF1ab      |
| 10449           | C                 | A                | SNP         | ORF1ab      |
| 11287           | GTCTGGTTT         | -                | DEL         | ORF1ab      |
| 11537           | A                 | G                | SNP         | ORF1ab      |
| 13195           | T                 | C                | SNP         | ORF1ab      |
| 14408           | C                 | T                | SNP         | ORF1ab      |
| 15240           | C                 | T                | SNP         | ORF1ab      |
| 18163           | A                 | G                | SNP         | ORF1ab      |
| <b>21762</b>    | <b>C</b>          | <b>T</b>         | <b>SNP</b>  | <b>S</b>    |
| <b>21766</b>    | <b>ACATGT</b>     | <b>-</b>         | <b>DEL</b>  | <b>S</b>    |
| <b>21987</b>    | <b>GTGTTTATTA</b> | <b>-</b>         | <b>DEL</b>  | <b>S</b>    |
| <b>22194</b>    | <b>ATT</b>        | <b>-</b>         | <b>DEL</b>  | <b>S</b>    |
| <b>22204</b>    | <b>-</b>          | <b>GAGCCAGAA</b> | <b>INS</b>  | <b>S</b>    |
| <b>22578</b>    | <b>G</b>          | <b>A</b>         | <b>SNP</b>  | <b>S</b>    |
| <b>22673</b>    | <b>T</b>          | <b>C</b>         | <b>SNP</b>  | <b>S</b>    |
| <b>22674</b>    | <b>C</b>          | <b>T</b>         | <b>SNP</b>  | <b>S</b>    |
| <b>22679</b>    | <b>T</b>          | <b>C</b>         | <b>SNP</b>  | <b>S</b>    |
| <b>22813</b>    | <b>G</b>          | <b>T</b>         | <b>SNP</b>  | <b>S</b>    |
| <b>22882</b>    | <b>T</b>          | <b>G</b>         | <b>SNP</b>  | <b>S</b>    |
| <b>22898</b>    | <b>G</b>          | <b>A</b>         | <b>SNP</b>  | <b>S</b>    |
| <b>22992</b>    | <b>G</b>          | <b>A</b>         | <b>SNP</b>  | <b>S</b>    |
| <b>22995</b>    | <b>C</b>          | <b>A</b>         | <b>SNP</b>  | <b>S</b>    |
| <b>23013</b>    | <b>A</b>          | <b>C</b>         | <b>SNP</b>  | <b>S</b>    |
| <b>23040</b>    | <b>A</b>          | <b>G</b>         | <b>SNP</b>  | <b>S</b>    |
| <b>23202</b>    | <b>C</b>          | <b>A</b>         | <b>SNP</b>  | <b>S</b>    |
| <b>23403</b>    | <b>A</b>          | <b>G</b>         | <b>SNP</b>  | <b>S</b>    |
| <b>23525</b>    | <b>C</b>          | <b>T</b>         | <b>SNP</b>  | <b>S</b>    |
| <b>23599</b>    | <b>T</b>          | <b>G</b>         | <b>SNP</b>  | <b>S</b>    |
| <b>23604</b>    | <b>C</b>          | <b>A</b>         | <b>SNP</b>  | <b>S</b>    |
| <b>23854</b>    | <b>C</b>          | <b>A</b>         | <b>SNP</b>  | <b>S</b>    |
| <b>23948</b>    | <b>G</b>          | <b>T</b>         | <b>SNP</b>  | <b>S</b>    |
| <b>24130</b>    | <b>C</b>          | <b>A</b>         | <b>SNP</b>  | <b>S</b>    |
| <b>24424</b>    | <b>A</b>          | <b>T</b>         | <b>SNP</b>  | <b>S</b>    |
| <b>24469</b>    | <b>T</b>          | <b>A</b>         | <b>SNP</b>  | <b>S</b>    |
| <b>24503</b>    | <b>C</b>          | <b>T</b>         | <b>SNP</b>  | <b>S</b>    |
| <b>25000</b>    | <b>C</b>          | <b>T</b>         | <b>SNP</b>  | <b>S</b>    |
| 25584           | C                 | T                | SNP         | ORF3a       |
| 26270           | C                 | T                | SNP         | E           |
| 26530           | A                 | G                | SNP         | M           |

|       |           |   |     |      |
|-------|-----------|---|-----|------|
| 26577 | C         | G | SNP | M    |
| 26709 | G         | A | SNP | M    |
| 27259 | A         | C | SNP | ORF6 |
| 28271 | A         | T | SNP | ORF8 |
| 28311 | C         | T | SNP | N    |
| 28369 | AGAACGCAG | - | DEL | N    |
| 28881 | G         | A | SNP | N    |
| 28882 | G         | A | SNP | N    |
| 28883 | G         | C | SNP | N    |

**Appendix Table S2 – List of primers**

| <b>Name</b>                  | <b>Sequence</b>                        | <b>Target</b>        | <b>Source</b>          |
|------------------------------|----------------------------------------|----------------------|------------------------|
| SARS-CoV-2 E<br>gene - fwd   | ACAGGTACGTTAATAGTTAATAGCGT             | SARS-CoV-2 E<br>gene | Monteil et al,<br>2020 |
| SARS-CoV-2 E<br>gene - rev   | ATATTGCAGCAGTACGCACACA                 | SARS-CoV-2 E<br>gene | Monteil et al,<br>2020 |
| SARS-CoV-2 E<br>gene - probe | FAM-ACACTAGCCATCCTTACTGCG<br>CTTCG-QSY | SARS-CoV-2 E<br>gene | Monteil et al,<br>2020 |
| Human RNase P<br>- fwd       | AGATTTGGACCTGCGAGCG                    | Human RNase P        | Monteil et al,<br>2020 |
| Human RNase P<br>- rev       | GAGCGGCTGTCTCCACAAGT                   | Human RNase P        | Monteil et al,<br>2020 |
| Human RNase P-<br>probe      | FAM-TTCTGACCTGAAGGCTCT<br>GCGCG-MGB    | Human RNase P        | Monteil et al,<br>2020 |



### Appendix Table S3 – List of antibodies

| Name                            | Vendor            | Conjugate    | Kit or product number                       |
|---------------------------------|-------------------|--------------|---------------------------------------------|
| ACE2 capture antibody           | R&D Systems       | unconjugated | DuoSet ELISA Kit, Human ACE2, DY933-05      |
| Mouse anti-His-tag              | Biorad            | unconjugated | MCA1396                                     |
| Anti-mouse IgG                  | CellSignaling     | HRP          | #7076S                                      |
| SARS-CoV-1 NP antibody (rabbit) | Sino Biological   | unconjugated | # 40143-R001 – cross reactive to SARS-CoV-2 |
| Goat anti-rabbit IgG            | Life Technologies | Alexa 647    | #A21245                                     |

**Appendix Table S4 – p-values for Figures and Appendix Figures**

| <b>Figure</b>      | <b>Condition</b>              | <b>p-value</b> |         |
|--------------------|-------------------------------|----------------|---------|
| <b>4a</b>          | Reference 5µg/ml vs. 10µg/ml  | 0.0421         |         |
|                    | Reference 5µg/ml vs. 25µg/ml  | 0.0081         |         |
|                    | Reference 10µg/ml vs. 25µg/ml | 0.3666         |         |
|                    | Alpha 5µg/ml vs. 10µg/ml      | 0.0014         |         |
|                    | Alpha 5µg/ml vs. 25µg/ml      | 0.0005         |         |
|                    | Alpha 10µg/ml vs. 25µg/ml     | 0.3873         |         |
|                    | Beta 5µg/ml vs. 10µg/ml       | 0.0128         |         |
|                    | Beta 5µg/ml vs. 25µg/ml       | 0.0033         |         |
|                    | Beta 10µg/ml vs. 25µg/ml      | 0.4126         |         |
|                    | Delta 5µg/ml vs. 10µg/ml      | 0.1471         |         |
|                    | Delta 5µg/ml vs. 25µg/ml      | 0.1308         |         |
|                    | Delta 10µg/ml vs. 25µg/ml     | 0.9953         |         |
|                    | Omicron 5µg/ml vs. 10µg/ml    | 0.1401         |         |
|                    | Omicron 5µg/ml vs. 25µg/ml    | 0.0282         |         |
|                    | Omicron 10µg/ml vs. 25µg/ml   | 0.4494         |         |
| <b>4b</b>          | Reference 5µg/ml vs. 10µg/ml  | 0.4903         |         |
|                    | Reference 5µg/ml vs. 25µg/ml  | 0.119          |         |
|                    | Reference 10µg/ml vs. 25µg/ml | 0.5112         |         |
|                    | Alpha 5µg/ml vs. 10µg/ml      | 0.9643         |         |
|                    | Alpha 5µg/ml vs. 25µg/ml      | 0.0292         |         |
|                    | Alpha 10µg/ml vs. 25µg/ml     | 0.0216         |         |
|                    | Beta 5µg/ml vs. 10µg/ml       | 0.1182         |         |
|                    | Beta 5µg/ml vs. 25µg/ml       | 0.0064         |         |
|                    | Beta 10µg/ml vs. 25µg/ml      | 0.0988         |         |
|                    | Delta 5µg/ml vs. 10µg/ml      | 0.2133         |         |
|                    | Delta 5µg/ml vs. 25µg/ml      | 0.0962         |         |
|                    | Delta 10µg/ml vs. 25µg/ml     | 0.8116         |         |
|                    | <b>Appendix 1a</b>            | Ref vs. N354D  | <0.0001 |
|                    |                               | Ref vs. V397F  | <0.0001 |
|                    |                               | Ref vs. R408I  | <0.0001 |
| Ref vs. W436R      |                               | <0.0001        |         |
| Ref vs. L452R      |                               | <0.0001        |         |
| Ref vs. A475V      |                               | 0.4302         |         |
| Ref vs. G476S      |                               | <0.0001        |         |
| Ref vs. V483A      |                               | <0.0001        |         |
| Ref vs. F490L      |                               | 0.9993         |         |
| Ref vs. N501Y      |                               | <0.0001        |         |
|                    | Ref vs. K417N/E484/N501Y      | <0.0001        |         |
| <b>Appendix 4a</b> | mACE2 Wuhan                   |                |         |
|                    |                               | 5 vs. 10       | 0.8621  |
|                    |                               | 5 vs. 25       | 0.993   |
|                    |                               | 10 vs. 25      | 0.9129  |
|                    |                               | mACE2 Omicron  |         |
|                    |                               | 5 vs. 10       | 0.5055  |
|                    |                               | 5 vs. 25       | <0.0001 |
|                    |                               | 10 vs. 25      | 0.0011  |
|                    |                               | hACE2 Wuhan    |         |
|                    |                               | 5 vs. 10       | 0.0378  |
|                    |                               | 5 vs. 25       | 0.0001  |
|                    |                               | 10 vs. 25      | 0.0639  |

|                    |                                 |         |
|--------------------|---------------------------------|---------|
|                    | hACE2 Omicron                   |         |
|                    | 5 vs. 10                        | 0.3532  |
|                    | 5 vs. 25                        | 0.0648  |
|                    | 10 vs. 25                       | 0.6051  |
| <b>Appendix 4b</b> | mACE2 Wuhan                     |         |
|                    | 5 vs. 10                        | 0.2375  |
|                    | 5 vs. 25                        | 0.2088  |
|                    | 10 vs. 25                       | 0.9966  |
|                    | mACE2 Omicron                   |         |
|                    | 5 vs. 10                        | 0.3403  |
|                    | 5 vs. 25                        | 0.0092  |
|                    | 10 vs. 25                       | 0.1861  |
|                    | hACE2 Wuhan                     |         |
|                    | 5 vs. 10                        | 0.8947  |
|                    | 5 vs. 25                        | <0.0001 |
|                    | 10 vs. 25                       | <0.0001 |
|                    | hACE2 Omicron                   |         |
|                    | 5 vs. 10                        | 0.8813  |
|                    | 5 vs. 25                        | 0.6869  |
|                    | 10 vs. 25                       | 0.934   |
| <b>Appendix 5a</b> | Vaccinee 1- Reference - Omicron |         |
|                    | 1/15                            | 0.0006  |
|                    | 1/30                            | 0.001   |
|                    | 1/45                            | 0.0049  |
|                    | Vaccinee 2- Reference - Omicron | 0.0012  |
|                    | 1/135                           | 0.0032  |
|                    | 1/270                           | 0.0001  |
|                    | 1/540                           |         |
|                    | Vaccinee 3- Reference - Omicron |         |
|                    | 1/90                            | 0.0004  |
|                    | 1/180                           | <0.0001 |
|                    | 1/360                           | 0.0001  |
|                    | Vaccinee 4- Reference - Omicron |         |
|                    | 1/45                            | <0.0001 |
|                    | 1/90                            | <0.0001 |
|                    | 1/180                           | <0.0001 |
